# Supplementary material for: Protein kinase Cδ is essential for the IgG response against T-cell-independent type 2 antigens and commensal bacteria
Source: eLife. 2021 Oct 25;10:e72116. doi: 10.7554/eLife.72116 (PMC8610492; doi:10.7554/eLife.72116)
Supplement: Figure 1—figure supplement 1—source data 1. [file elife-72116-fig1-figsupp1-data1.xlsx]

## Sheet: S1A
Figure S1A
LPS
	IgG conc.			Tukey's multiple comparisons test	Summary	Adjusted P Value
-	4.182	3.532		(–) vs. NP-Ficoll	**	0.0032
NP-CGG	6.745	7.098		NP-CGG vs. NP-Ficoll	*	0.0131
NP-Ficoll	17.984	19.161
R-848
	IgG conc.			Tukey's multiple comparisons test	Summary	Adjusted P Value
-	2.56	2.513		(–) vs. NP-Ficoll	****	<0.0001
NP-CGG	7.842	7.4		NP-CGG vs. NP-Ficoll	***	0.0002
NP-Ficoll	35.563	24.661
CpG
	IgG conc.			Tukey's multiple comparisons test	Summary	Adjusted P Value
-	0.833	1.067		(–) vs. NP-Ficoll	****	<0.0001
NP-CGG	1.802	1.731		NP-CGG vs. NP-Ficoll	****	<0.0001
NP-Ficoll	32.069	24.216

## Sheet: S1C
Figure S1C AICDA transcripts (relative fold)
LPS
	expression	SD
-	23.281	5.439
NP-CGG	73.531	37.362
NP-Ficoll	199.396	48.916
R-848
	expression	SD
-	41.391	15.323
NP-CGG	66.018	15.974
NP-Ficoll	115.335	15.902
CpG
	expression	SD
-	0.801	0.461
NP-CGG	2.599	1.841
NP-Ficoll	29.356	7.513

## Sheet: S1D
Figure S1D
	IgG3 (AU)
-	2.418
IL1α	200.606
IL1β	217.375
IL2	1.723
IL3	2.33406
IL4	2.984
IL5	14.354
IL6	2.565
IL7	1.798
IL9	3.896
IL10	2.265
IL12	4.191
IL13	3.648
IL15	1.991
IL17A	2.754
IL17F	3.14
IL21	9.064
IL23	1.881
IL27	1.149
IL33	3.17
IFNα	70.106
IFNγ	9.237
IFNλ2	2.873
TGFβ	1.57
SCF	4.184
GMCSF	4.36481
TNFα	2.58677
APRIL	2.03656
