# Supplementary material for: Protein kinase Cδ is essential for the IgG response against T-cell-independent type 2 antigens and commensal bacteria
Source: eLife. 2021 Oct 25;10:e72116. doi: 10.7554/eLife.72116 (PMC8610492; doi:10.7554/eLife.72116)
Supplement: Figure 1—source data 1. [file elife-72116-fig1-data1.xlsx]

## Sheet: 1A
Figure 1A : 3H-thymidine uptake (cpm)
stimulation conc.	NP-CGG			NP-Ficoll
0	55	60	66	55	60	66
0.1	75	37	28	3830	3891	3997
1	97	60	76	5817	5867	6013
10	915	671	808	7024	7033	7266
100	107	101	102	6950	7238	6834
1000	110	97	86	6123	6033	5919

## Sheet: 1B
Figure 1B
IgM
	Ig conc.			Tukey's multiple comparisons test	Summary	Adjusted P Value
-	0	0		(–) vs. NP-Ficoll	*	0.0165
NP-CGG	0	0		NP-CGG vs. NP-Ficoll	*	0.0165
NP-Ficoll	6.083	9.021
IgG
	Ig conc.
-	0.535	0.172
NP-CGG	0.4	0.361
NP-Ficoll	0.465	0.259

## Sheet: 1C
Figure 1C
(–)
	IgG3 (AU)
-	0.603	0.374
NP-CGG	0.076	0.551
NP-Ficoll	0.421	0.478
IL-1a
	IgG3 (AU)			Tukey's multiple comparisons test	Summary	Adjusted P Value
-	0.626	0.411		(–) vs. NP-Ficoll	****	<0.0001
NP-CGG	0.757	0.214		NP-CGG vs. NP-Ficoll	****	<0.0001
NP-Ficoll	19.802	18.404
IL-1b
	IgG3 (AU)			Tukey's multiple comparisons test	Summary	Adjusted P Value
-	0.398	0.347		(–) vs. NP-Ficoll	****	<0.0001
NP-CGG	0.163	0.333		NP-CGG vs. NP-Ficoll	****	<0.0001
NP-Ficoll	13.213	14.235
IFNa
	IgG3 (AU)			Tukey's multiple comparisons test	Summary	Adjusted P Value
-	0.409	0.11		(–) vs. NP-Ficoll	***	0.0006
NP-CGG	0.478	0.204		NP-CGG vs. NP-Ficoll	***	0.0007
NP-Ficoll	2.734	3.633

## Sheet: 1D
Figure 1D
(–)
	IgG3+ cells (%)
-	0.11	0.42
NP-CGG	0.25	0.33
NP-Ficoll	0.14	0.039
IL-1a
	IgG3+ cells (%)				Tukey's multiple comparisons test	Summary	Adjusted P Value
-	0.22	0.31	0.17		(–) vs. NP-Ficoll	****	<0.0001
NP-CGG	0.32	0.6	0.2		NP-CGG vs. NP-Ficoll	****	<0.0001
NP-Ficoll	2.68	2.84	2.77
IL-1b
	IgG3+ cells (%)				Tukey's multiple comparisons test	Summary	Adjusted P Value
-	0.041	0.042	0.037		(–) vs. NP-Ficoll	****	<0.0001
NP-CGG	0.38	0.44			NP-CGG vs. NP-Ficoll	****	<0.0001
NP-Ficoll	2.39	2.47	2.56
IFNa
	IgG3+ cells (%)				Tukey's multiple comparisons test	Summary	Adjusted P Value
-	0.33	0.14	0.28		(–) vs. NP-Ficoll	****	<0.0001
NP-CGG	0.18	0.2			NP-CGG vs. NP-Ficoll	****	<0.0001
NP-Ficoll	2.04	2.01	1.95

## Sheet: 1E
Figure 1E
circle Iγ3-Cµ transcripts (relative fold)				AICDA transcripts (relative fold)
(–)				(–)
	expression	SD			expression	SD
-	1	0.366		-	1	0.111
NP-CGG	1.071	1.61		NP-CGG	1.373	0.421
NP-Ficoll	2.959	1.754		NP-Ficoll	0.779	0.206
IL-1a				IL-1a
	expression	SD			expression	SD
-	6.493	0.329		-	0.634	0.437
NP-CGG	7.66	3.54		NP-CGG	1.001	0.73
NP-Ficoll	721.25	127.228		NP-Ficoll	69.983	8.218
IL-1b				IL-1b
	expression	SD			expression	SD
-	2.659	0.523		-	0.578	-
NP-CGG	0.179	0.094		NP-CGG	1.792	1.362
NP-Ficoll	681.077	106.723		NP-Ficoll	56.408	8.938
IFNa				IFNa
	expression	SD			expression	SD
-	1.098	0.503		-	0.392	-
NP-CGG	0	0.453		NP-CGG	0.248	-
NP-Ficoll	323.732	19.121		NP-Ficoll	31.784	6.064
*SD = - : The Experiment was performed triplicate in each experiment, but the target gene expression was able to be detected in only 1 sample due to too low expression.
