# Supplementary material for: Protein kinase Cδ is essential for the IgG response against T-cell-independent type 2 antigens and commensal bacteria
Source: eLife. 2021 Oct 25;10:e72116. doi: 10.7554/eLife.72116 (PMC8610492; doi:10.7554/eLife.72116)
Supplement: Figure 2—figure supplement 1—source data 1. [file elife-72116-fig2-figsupp1-data1.xlsx]

## Sheet: S2A B
Figure S2A: 3H-thymidine uptake (cpm)
	Prkcd+/+			Prkcd-/-
–	55	60	66	57	74	49
NP-Ficoll	7218	7088	7447	6950	7238	6834
Figure S2B: IgM conc.
	Prkcd+/+			Prkcd-/-
–	1.204	1.347		2.675	2.641
NP-Ficoll	102.617	97.409	97.08	92.429	75.996	72.754

## Sheet: S2D
Figure S2D
IgM conc.
	Prkcd+/+		Prkcd-/-
LPS	123.03	113.027	141.466	192.647
R-848	212.597	215.348	197.46	199.016
CpG	40.674	42.905	77.457	71.996
IgG conc.						Prkcd+/+ vs Prkcd-/- T-test
	Prkcd+/+		Prkcd-/-				Summary	P value
LPS	67.784	81.707	39.601	27.468		LPS	*	0.046715
R-848	143.271	165.933	55.169	43.33		R-848	*	0.014407
CpG	175.827	170.311	54.278	50.917		CpG	***	0.000718

## Sheet: S2E
Figure S2E
AICDA transcripts (relative fold)
	Prkcd+/+		Prkcd-/-
	expression	SD	expression	SD
LPS	1	0.245	0.481	0.076
R-848	1	0.138	0.645	0.075
CpG	1	0.256	0.231	0.011

## Sheet: S2F
Figure S2F
IgM conc.
	Prkcd+/+		Prkcd-/-
LPS	52.407	57.969	118.45	102.501
R-848	51.099	51.159	106.771	106.326
CpG	1.445	1.374	7.622	7.217
IgG conc.						Prkcd+/+ vs Prkcd-/- T-test
	Prkcd+/+		Prkcd-/-				Summary	P value
LPS	4.182	3.532	4.815	6.17		LPS	*	0.015892
R-848	2.56	2.513	6.042	4.456		R-848	***	0.000236
CpG	0.833	1.067	2.314	1.74		CpG	*	0.005091

## Sheet: S2G
Figure S2G
AICDA transcripts (relative fold)
	Prkcd+/+		Prkcd-/-
	expression	SD	expression	SD
LPS	1	0.234	2.022	0.405
R-848	1	0.37	1.181	0.18
CpG	1	0.575	0.776	1.396
