# Supplementary material for: Protein kinase Cδ is essential for the IgG response against T-cell-independent type 2 antigens and commensal bacteria
Source: eLife. 2021 Oct 25;10:e72116. doi: 10.7554/eLife.72116 (PMC8610492; doi:10.7554/eLife.72116)
Supplement: Figure 2—source data 1. [file elife-72116-fig2-data1.xlsx]

## Sheet: 2B
Figure 2B
IgM conc.
	Prkcd+/+		Prkcd-/-
IL1α	22.7159	19.0683	21.491	21.66
IL1β	17.9938	17.3719	18.534	19.297
IFNα	4.99919	4.7642	3.003	3.3796
IgG3 (AU)						Prkcd+/+ vs Prkcd-/- T-test
	Prkcd+/+		Prkcd-/-				Summary	P value
IL1α	110.756	87.858	6.183	10.209		IL1α	*	0.015892
IL1β	89.437	87.912	9.676	11.526		IL1β	***	0.000236
IFNα	20.461	22.742	2.378	3.739		IFNα	*	0.005091

## Sheet: 2C
Figure 2C IgG3+ cells (%)
IL-1a								Prkcd+/+ vs Prkcd-/- T-test
division number	Prkcd+/+			Prkcd-/-				division number	Summary	P value
1	0.052	0.2	0.18	0.04	0.04	0.08		1
2	0.47	0.69	0.48	0.12	0.05	0.1		2	**	0.003614
3	1.94	2.18	2.03	0.2	0.14	0.2		3	**	1.4e-05
4	3.93	4.31	4.34	0.35	0.3	0.34		4	**	8e-06
5	7.26	6.63	6.8	0.41	0.52	0.26		5	**	6e-06
6	8.33	8.69	9.18	1.09	0	0		6	**	4.5e-05
7	6.89	8.28	6.92	0	0	0		7	**	8.8e-05
IL1β								Prkcd+/+ vs Prkcd-/- T-test
division number	Prkcd+/+			Prkcd-/-				division number	Summary	P value
1	0.13	0.17	0	0.16	0	0.15		1
2	0.39	0.28	0.46	0.051	0.05	0.15		2	**	0.018186
3	1.73	1.95	2.13	0.32	0.11	0.17		3	**	0.000663
4	3.96	4.15	4.21	0.74	0.69	0.44		4	**	5e-05
5	6.06	5.72	6.21	1.56	0.39	0.82		5	**	0.000663
6	7.77	8.12	8.23	0	0	0		6	**	4e-06
7	8.43	7.34	7.69	0	0	0		7	**	8.5e-05
IFNα								Prkcd+/+ vs Prkcd-/- T-test
division number	Prkcd+/+			Prkcd-/-				division number	Summary	P value
1	0.27	0.38	0.27	0.16	0	0.15		1
2	0.34	0.45	0.41	0.051	0.05	0.15		2	**	0.002379
3	1.68	1.58	1.64	0.32	0.11	0.17		3	**	3.2e-05
4	3.85	3.57	3.24	0.74	0.69	0.44		4	**	0.000124
5	5.41	6.02	4.86	1.56	0.39	0.82		5	**	0.000709
6	5.02	6.85	5.28	0	0	0		6	**	0.000562
7	8.56	4.84	7	0	0	0		7	**	0.003235

## Sheet: 2D
Figure 2D
circle Iγ3-Cµ transcripts (relative fold)
	Prkcd+/+		Prkcd-/-
	expression	SD	expression	SD
IL1α	1	0.176	0.00016	2e-05
IL1β	1	0.157	0.003	0.001
IFNα	1	0.059	0.00015	2e-05
AICDA transcripts (relative fold)
	Prkcd+/+		Prkcd-/-
	expression	SD	expression	SD
IL1α	1	0.117	0.348	0.071
IL1β	1	0.158	0.302	0.077
IFNα	1	0.191	0.269	0.069
