# Supplementary material for: Protein kinase Cδ is essential for the IgG response against T-cell-independent type 2 antigens and commensal bacteria
Source: eLife. 2021 Oct 25;10:e72116. doi: 10.7554/eLife.72116 (PMC8610492; doi:10.7554/eLife.72116)
Supplement: Figure 3—figure supplement 1—source data 1. [file elife-72116-fig3-figsupp1-data1.xlsx]

## Sheet: S3A
Figure S3A: cells (per 1x107 lymphocytes)
Spleen									Prkcd+/+ vs Prkcdf/f T-test
	Prkcd+/+				Prkcd flox/flox				Summary	P value
Fo B	4846816	4.91225e+06	4.31773e+06	4326908	4.72556e+06	4278141	4.20154e+06	4.44118e+06	-	0.3776
MZ B	396717	403949	422118	399745	490632	385762	380784	431816	-	0.5486
B1a	78080	71721	78960	77452	172480	195622	216996	186421	****	<0.0001
B1b	181780	142216	174276	193630	373824	387506	341380	349287	****	<0.0001
PerC									Prkcd+/+ vs Prkcdf/f T-test
	Prkcd+/+				Prkcd flox/flox				Summary	P value
B2	5092890	4456660	3852360	5649960	4574480	5069220	4053440	4600800	-	0.6841
B1a	872850	1490840	1832220	1008640	1519200	905840	1322880	1252440	-	0.8482
B1b	1593900	1903200	2051460	1166240	2202840	2717520	3078240	2590080	*	0.0109

## Sheet: S3B
Figure S3B
anti-NP IgM													Prkcd+/+ vs Prkcdf/f T-test
week	Prkcd+/+						Prkcd flox/flox						Summary	P value
0	1.29833	2.77353	1.15421	2.01717	15.9072	1.78753	8.6347	16.1988	4.1095	4.26462	7.07244	5.21829	-	0.281328
1	128.537	187.27	97.8344	176.976	104.425	135.077	511.787	581.628	495.676	498.521	642.116	576.694	****	<0.000001
3	89.3411	123.27	29.465	71.2596	73.8534	54.3498	68.7542	59.1757	37.471	47.659	48.9935	34.9898	-	0.217922
anti-NP IgG1
	Prkcd+/+						Prkcd flox/flox
0	0	0.00256	0	0	0.000853	0	0.002951	0	0.006212	0	0.008575	0.00256
1	306.919	392.101	319.243	188.6	436.603	530.872	305.134	315.419	346.516	614.854	510.408	505.664
3	399.103	284.925	109.458	206.813	226.811	244.299	460.116	310.04	552.99	562.494	274.358	468.883
anti-NP IgG3
	Prkcd+/+						Prkcd flox/flox
0	0.02065	0.02813	0.01638	0.03386	0.0706	0.0602	0.06762	0.01161	0.01443	0	0.01543	0.01458
1	133.781	148.731	151.149	149.65	86.822	208.275	254.216	230.804	85.2309	83.4832	137.957	24.5988
3	136.545	102.04	37.0619	91.7836	53.8776	111.44	236.209	116.432	31.243	23.2005	47.7568	6.76206
