# Supplementary material for: Protein kinase Cδ is essential for the IgG response against T-cell-independent type 2 antigens and commensal bacteria
Source: eLife. 2021 Oct 25;10:e72116. doi: 10.7554/eLife.72116 (PMC8610492; doi:10.7554/eLife.72116)
Supplement: Figure 3—source data 1. [file elife-72116-fig3-data1.xlsx]

## Sheet: 3A
Figure 3A
anti-NP IgM															Prkcd+/+ vs Prkcdf/f T-test
week	Prkcd+/+						Prkcd flox/flox								Summary	P value
0	0.61818	1.10009	0.57574	0.54847	0.57642	2.87448	2.60077	2.61976	2.09841	1.58472	1.49327	0.98988			-	0.095022
1	54.6952	42.5423	66.4181	45.0313	19.1809	27.925	151.182	150.408	172.41	167.063	146.46	75.8097	51.6079	34.8458	**	0.007293
2	62.2962	39.8629	117.651	72.5439	44.0426	35.0284	165.245	127.222	214.715	128.331	123.761	82.1203	51.5051	47.561	-	0.051401
4	65.376	41.5518	124.708	60.4473	37.6327	36.4621	328.329	180.286	301.048	185.714	97.5043	53.8327	55.2515	33.3219	-	0.078307
anti-NP IgG3															Prkcd+/+ vs Prkcdf/f T-test
week	Prkcd+/+						Prkcd flox/flox								Summary	P value
0	0.01439	0.52193	0.01385	0.01256	0.02113	0.01285	0.00696	0.00932	0.02122	0.01213	0.04139	0.00628			-	0.348845
1	33.0189	33.6831	17.79	11.8421	9.12622	6.27103	0.88368	0.59251	0.02464	1.02398	1.87764	0.10485	0.41074	0.18151	**	0.00106738
2	72.1549	70.1059	102.648	68.1285	49.7	21.2106	0.66927	2.15944	0.03238	5.5705	11.5124	0.22761	2.43142	0.53071	***	3.438e-05
4	4.41627	55.1405	161.803	104.538	53.4794	27.4132	0.24169	1.92836	0.02379	3.86625	12.3831	0.13232	2.37968	0.26015	**	0.00669318

## Sheet: 3B
Figure 3B
anti-NP IgG1														Prkcd+/+ vs Prkcdf/f T-test
Prkcd+/+						Prkcd flox/flox								Summary	P value
647.458	684.402	1528.37	828.881	397.18	457.188	106.555	374.72	91.536	120.715	310.559	7.66	56.63	36.96	*	0.0125
anti-NP IgG2b														Prkcd+/+ vs Prkcdf/f T-test
Prkcd+/+						Prkcd flox/flox								Summary	P value
247.459	211.87	179.614	109.464	40.222	66.4283	2.17694	3.20514	1.61272	1.86829	7.27199	0.50299	0.80067	0.58491	**	0.009
anti-NP IgG2c														Prkcd+/+ vs Prkcdf/f T-test
Prkcd+/+						Prkcd flox/flox								Summary	P value
237.337	244.387	160.573	198.431	74.2806	115.303	2.28482	0	2.17487	0	0	0	0	0	**	0.0016

## Sheet: 3C
Figure 3C
% of cells (in NP-binding PCs)											Prkcd+/+ vs Prkcdf/f T-test
	Prkcd+/+					Prkcd flox/flox					Summary	P value
IgM+	55.4	48.1	44.6	53.4	50.5	93.2	96.6	93.7	96.7	96.1	****	<0.000001
IgG3+	31.8	33.4	42.8	35.9	36.2	3.44	1.56	2.53	0.82	0.89	****	<0.000001
IgG2b+	3.04	5.66	2.62	2.26	3.56	0.52	0.41	0.42	0.24	0.69	**	0.001153
cells (per 1x107 lymphocytes)											Prkcd+/+ vs Prkcdf/f T-test
	Prkcd+/+					Prkcd flox/flox					Summary	P value
IgM+	8864	10101	16948	10146	10605	30756	15456	12181	9670	24025	-	0.128299
IgG3+	5088	7014	16264	6821	7602	1135.2	249.6	328.9	82	222.5	**	0.003356
IgG2b+	486.4	1188.6	995.6	429.4	747.6	171.6	65.6	54.6	24	172.5	**	0.001957

## Sheet: 3D
Figure 3D
anti-PPS3 IgM																	Prkcd+/+ vs Prkcdf/f T-test
week	Prkcd+/+								Prkcd flox/flox								Summary	P value
0	215.437	123.309	167.519	165.434	366.796	332.663	526.958	296.708	319.425	210.523	373.288	314.879	252.098	162.666	1072.09	265.741	-	0.405981
1	1579.47	2140.52	1745.12	1730.68	4613.15	1903.96	3153.24	1619.37	2846.73	6472.07	4376.12	2324.8	4957.49	5817.98	4777.47	3678.32	**	0.004733
2	1099.73	1504.34	1372.14	2172.55	2015.45	1692.85	3080.26	2056.72	1346.74	3167.69	4433.63	2794.14	3377.74	5213.64	2618.58	1666.4	-	0.03252
4	972.386	1555.77	1467.36	1363.87	1594.46	1448.23	1930.8	1498.36	1001.82	2390.96	2128.89	1281.31	1308.88	4129.19	2118.97	2256.74	-	0.117946
anti-PPS3 IgG3																	Prkcd+/+ vs Prkcdf/f T-test
week	Prkcd+/+								Prkcd flox/flox								Summary	P value
0	4.473	2.979	1.344	10.338	69.212	14.627	32.982	18.83	0	2.412	0	34.919	0	0	1.711	3.666	-	0.144582
1	211.026	322.891	456.07	291.001	456.223	325.892	262.832	168.497	0	22.513	5.623	36.211	3.022	7.653	11.048	12.896	****	1e-06
2	314.08	380.012	657.089	678.765	466.214	365.945	381.508	357.492	1.987	33.125	0	4.231	0	0	6.915	13.938	****	<0.000001
4	247.889	278.533	747.484	866.095	614.407	608.17	330.431	351.303	0	19.26	0	43.878	0	0	3.999	4.899	****	3.3e-05
