# Supplementary material for: Protein kinase Cδ is essential for the IgG response against T-cell-independent type 2 antigens and commensal bacteria
Source: eLife. 2021 Oct 25;10:e72116. doi: 10.7554/eLife.72116 (PMC8610492; doi:10.7554/eLife.72116)
Supplement: Figure 4—source data 1. [file elife-72116-fig4-data1.xlsx]

## Sheet: 4A
Figure 4A
IgG3+ cells (% per donor cells)										Prkcd+/+ vs Prkcdf/f T-test
Prkcd+/+					Prkcd flox/flox					Summary	P value
29.8	29.8	29.8	24.3	29.5	3.09	3.34	2.94	2.65	3.06	****	<0.000001
IgG3+ cells (% per each division number)											Prkcd+/+ vs Prkcdf/f T-test
division number	Prkcd+/+					Prkcd flox/flox					Summary	P value
0	0	0	0	0	0	0	0	0	0	0
1	0	2.99	0	0	0	0	0	0	0	0	**	0.346594
2	2.88	2.82	0.61	0.93	1.96	0	0	0	0	0	**	0.004393
3	10.1	9.73	7.92	6.14	8.94	0	0.61	0	0.32	0.65	**	3e-06
4	25.5	22.4	18	15.3	18.7	0.83	0.92	0.56	0.14	0.36	**	5e-06
5	31.6	32.5	26.5	26.1	29.5	1.77	2.32	1.55	1.38	1.8	**	<0.000001
6	38.8	37.1	35.5	33.3	35.8	2.01	2.98	3.08	2.29	2.32	**	<0.000001
7	38.9	42.2	38.8	38.9	39.8	2.93	3.99	2.87	2.47	3.15	**	<0.000001
8	39.2	41.4	40.8	34.8	40.7	4.9	4.45	5.34	5.54	4.29	**	<0.000001

## Sheet: 4B
Figure 4B : expression of transcripts (relative fold)
	Prkcd+/+		Prkcd-/-
	expression	SD	expression	SD
circle Iγ3-Cµ	1	0.07	0.15	0.01
post-switch Iµ-Cγ3	1	0.026	0.024	3
germiline Iµ-Cµ	1	0.088	1.368	0.193
germiline Iγ3-Cγ3	1	0.063	0.943	0.043
AICDA	1	0.062	0.292	0.019

## Sheet: 4C
Figure 4C : IgG3+ cells (% per donor GFP+ cells)
					Tukey's multiple comparisons test
Prkcd+/+	Prkcd flox/flox						Summary	Adjusted P Value
Ev	Ev	AID	PKCδ		Prkcd flox/flox	Ev vs. AID	****	<0.0001
25.2	6.47	12.9	18.2			Ev vs. PKCδ	****	<0.0001
18	4.27	12.7	13.3			AID vs. PKCδ	ns	0.6794
18.6	4.32	13.1	22.2
21.2	4.4	11.8	19.5
15.7	3.15	12.6	9.12
17.1	1.83	12.6	9.82
18	1.52		12.1
	1.86		11.6
	3.16
