# Supplementary material for: Protein kinase Cδ is essential for the IgG response against T-cell-independent type 2 antigens and commensal bacteria
Source: eLife. 2021 Oct 25;10:e72116. doi: 10.7554/eLife.72116 (PMC8610492; doi:10.7554/eLife.72116)
Supplement: Figure 5—figure supplement 1—source data 12. [file elife-72116-fig5-figsupp1-data12.xlsx]

## Sheet: S5C
Figure S5C BATF transcripts (relative fold)
		Prkcd+/+		Prkcd-/-
stimulation		expression	SD	expression	SD
-		1	0.12	1.233	0.669
+NP-Ficoll	-	7.837	1.32	2.538	0.562
	IL1α	8.69	1.002	2.801	0.39
	IL1β	8.914	0.627	3.43	0.634
	IFNα	7.256	0.585	2.807	0.5
