# Supplementary material for: Protein kinase Cδ is essential for the IgG response against T-cell-independent type 2 antigens and commensal bacteria
Source: eLife. 2021 Oct 25;10:e72116. doi: 10.7554/eLife.72116 (PMC8610492; doi:10.7554/eLife.72116)
Supplement: Figure 5—source data 1. [file elife-72116-fig5-data1.xlsx]

## Sheet: 5A
Figure 5A Relative expression
	expression	SD
BATF	0.453661	0.0183679
IRF4	0.932704	0.0780442
Rel	1.02812	0.0709262
Bach2	1.08337	0.0605523
Foxo1	1.1058	0.161913
RelA	1.14197	0.0533332
E2A	1.22043	0.14215
RelB	1.50384	0.139608
Pax5	1.79094	0.157958

## Sheet: 5B
Figure 5B BATF transcripts (relative fold)
	Prkcd+/+		Prkcd-/-
	expression	SD	expression	SD
-	1	0.531	1.375	0.746
IL1α	1.592	0.338	1.637	0.724
IL1β	1.783	0.09	1.93	1.724
IFNα	1.682	0.606	2.036	0.525
NP-CGG	0.878	0.929	1.074	1.068
NP-Ficoll	7.686	1.527	2.83	0.626

## Sheet: 5D
Figure 5D transcripts (relative fold)
	shControl		shBATF
	expression	SD	expression	SD
Batf	0.951	0.0488248	0.404	0.106
Aicda	0.973	0.0748052	0.48	0.0157225

## Sheet: 5E
Figure 5E: IgG3+ cells (% per donor GFP+ cells)
shControl	shBATF		T-test
18.6	6.77		Summary	P value
18.5	7.75		****	<0.0001
18.1	7.57
18.1	7.53

## Sheet: 5F
Figure 5F Aicda transcripts (relative fold)
	expression	SD
Ev	0.88	0.192876
BATF	1.665	0.232346
PKCδ	2.471	0.401983

## Sheet: 5G
Figure 5G IgG3+ cells (% per donor GFP+ cells)
Ev	BATF	PKCδ		Tukey's multiple comparisons test
2.21	5.54	12.8			Summary	Adjusted P Value
3.15	7.76	9.76		Ev vs. BATF	***	0.0002
3.38	5.97	14		Ev vs. PKCδ	****	<0.0001
3.37	4.87	14.1
3.15	4.2	9.12
1.83	4.85	9.82
1.52	4.75	12.1
1.86	6.08	11.6
3.16	7.93
