# Supplementary material for: Protein kinase Cδ is essential for the IgG response against T-cell-independent type 2 antigens and commensal bacteria
Source: eLife. 2021 Oct 25;10:e72116. doi: 10.7554/eLife.72116 (PMC8610492; doi:10.7554/eLife.72116)
Supplement: Figure 6—source data 1. [file elife-72116-fig6-data1.xlsx]

## Sheet: 6A
Figure 6A anti-bacteria Ig
															Prkcd+/+ vs Prkcdf/f T-test
	Prkcd+/+							Prkcd flox/flox							Summary	P value
IgM	52.5001	55.3752	118.299	69.7759	37.0145	48.2428	39.5016	29.9603	28.7424	32.944	36.2066	38.5923	29.8391	45.6932	-	0.052
IgG1	36.8401	461.403	11.8851	51.1309	27.3153	8.9842	133.188	265.597	108.709	53.7343	192.235	14.5345	13.8888	365.473	-	0.6221
IgG2b	111.611	134.026	798.114	76.4017	62.9358	62.4684	28.1062	45.062	78.251	73.4246	95.8454	53.1707	16.5348	39.9895	-	0.2757
IgG3	79.3851	236.514	172.103	136.262	34.611	360.648	121.09	0	0	0.0753	10.0007	7.8915	9.9835	1.4776	**	0.0082

## Sheet: 6B
Figure 6B CFU (per ml)
aerobe			anaerobe			Prkcd+/+ vs Prkcdf/f T-test
Prkcd+/+	Prkcd flox/flox		Prkcd+/+	Prkcd flox/flox			Summary	P value
40	260		20	500		aerobe	**	0.001321
0	40		180	620		anaerobe	***	0.000198
0	780		160	1080
40	40		160	1120
0	420		160	4120
0	460		0	4140
60	80		180	480
40	80		720	1640
200	1160		120	4080
0	680		320	5240
20	240		0	4000
40			1200
120			840
0			400
80			600
