# Supplementary material for: Protein kinase Cδ is essential for the IgG response against T-cell-independent type 2 antigens and commensal bacteria
Source: eLife journal article supplement (doi:10.7554/elife.72116), 2021-10-25

Stimulation : NP-CGG NP-Ficoll  
Time (min) : 0 5 15 60 5 15 60

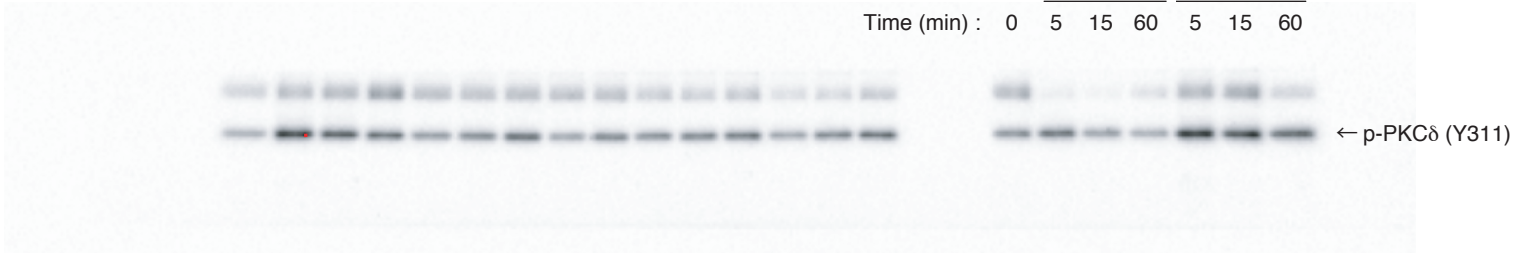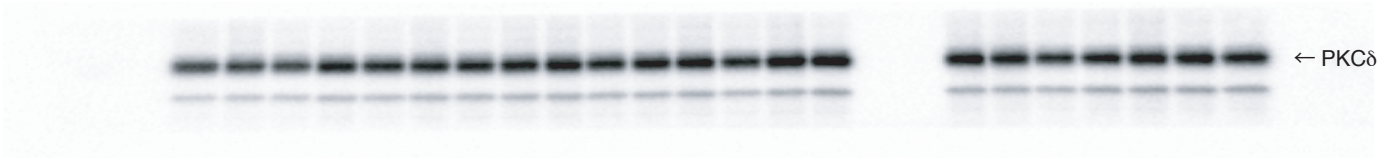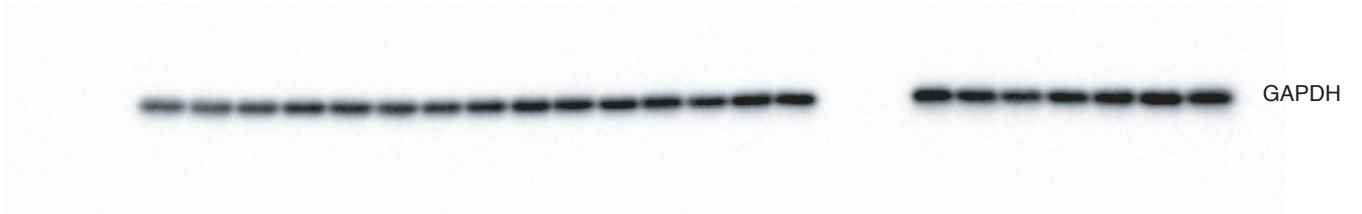

Supplement: supp [file elife-72116-supp-v1.zip]
