# Supplementary material for: Protein kinase Cδ is essential for the IgG response against T-cell-independent type 2 antigens and commensal bacteria
Source: eLife journal article supplement (doi:10.7554/elife.72116), 2021-10-25

Time (hour) :  $\frac{Prkcd^{+/+}}{0 \quad 24 \quad 48}$   $\frac{Prkcd^{-/-}}{0 \quad 24 \quad 48}$

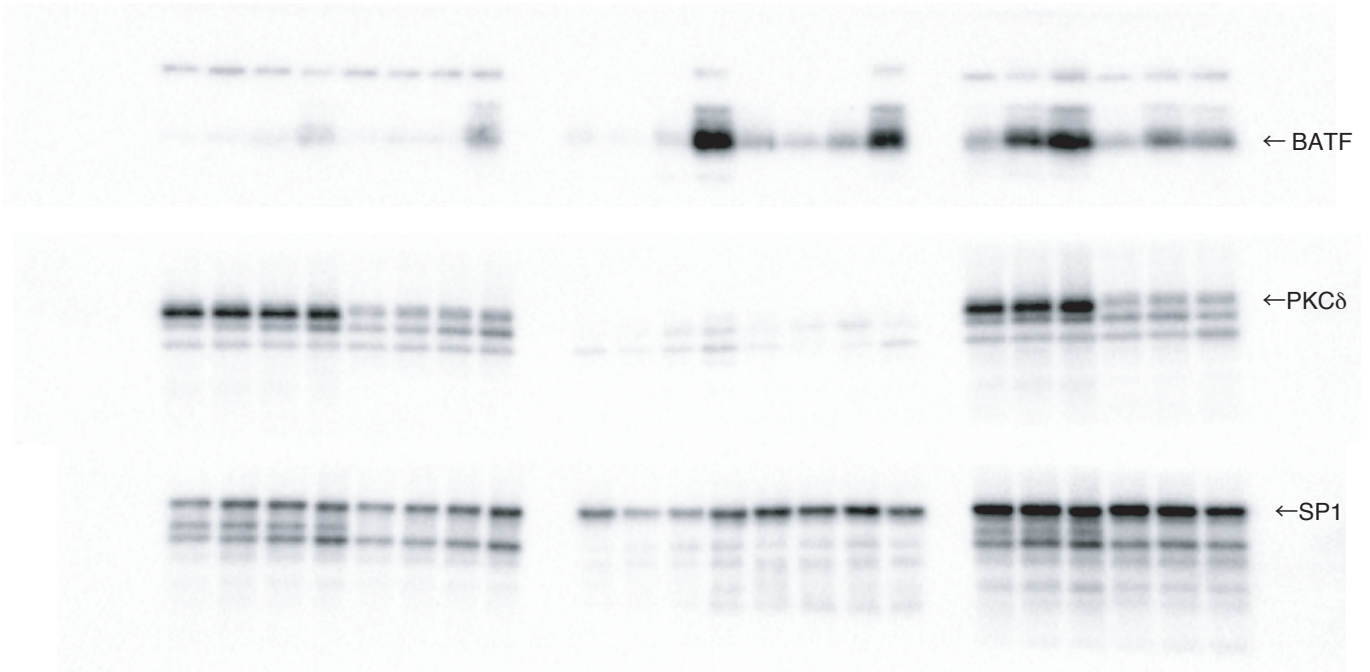

Supplement: supp [file elife-72116-supp-v1.zip]
