# Supplementary material for: Protein kinase Cδ is essential for the IgG response against T-cell-independent type 2 antigens and commensal bacteria
Source: eLife journal article supplement (doi:10.7554/elife.72116), 2021-10-25

Figure 1-figure supplement 1. TI-2 Ag induces the generation of IgG cells in the presense of secondary stimulation

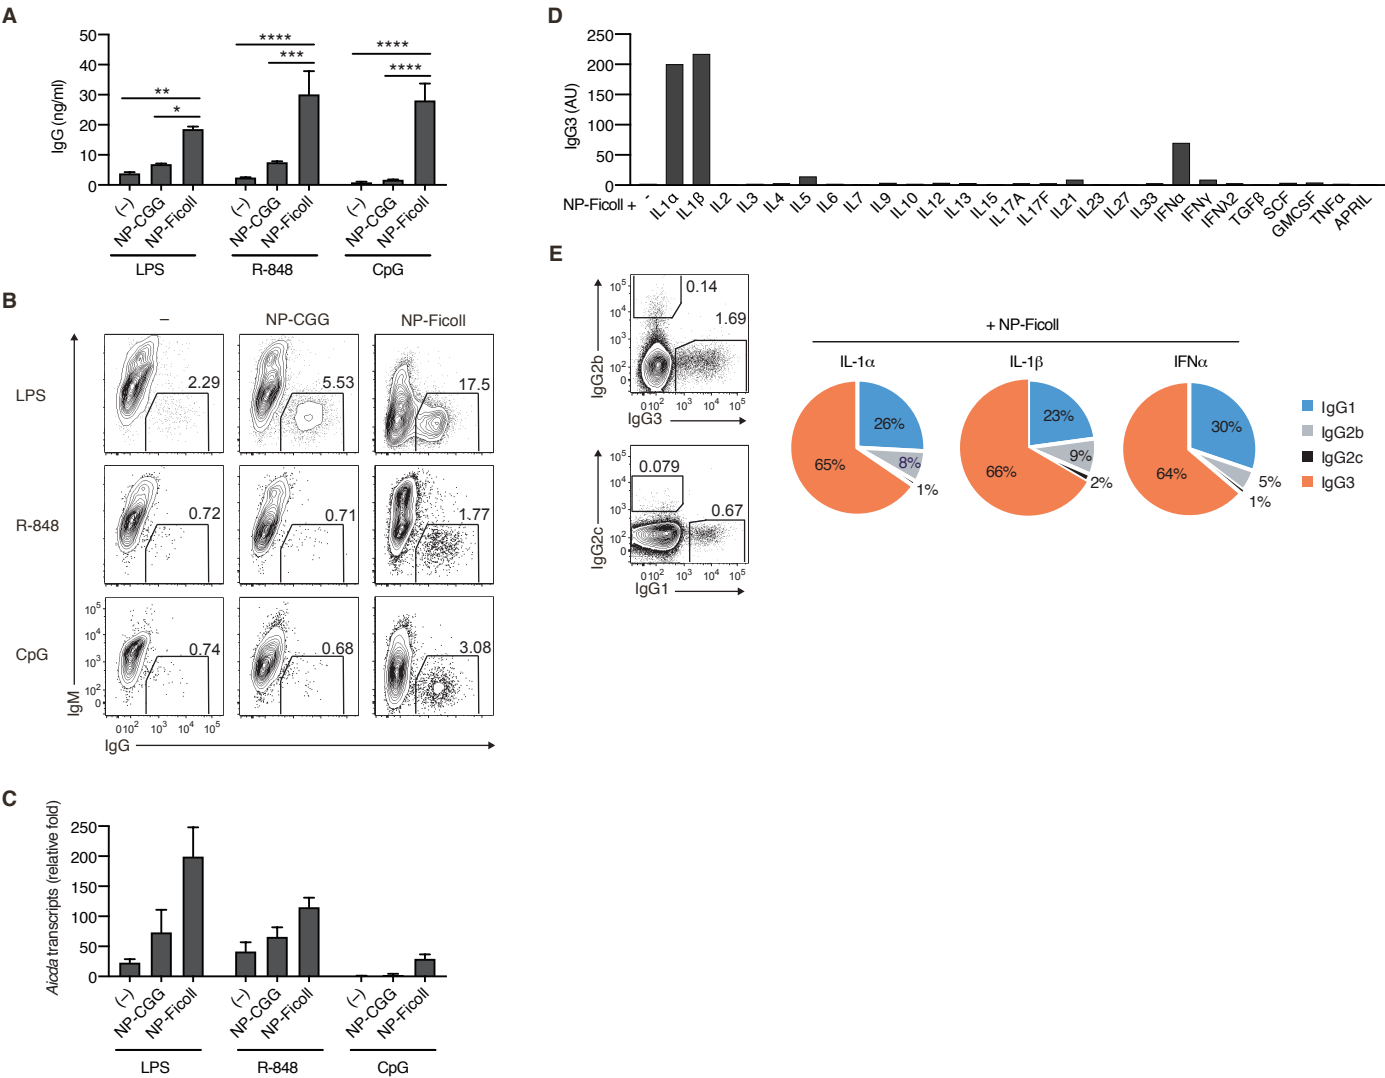

Supplement: supp [file elife-72116-supp-v1.zip]
