# Supplementary material for: Protein kinase Cδ is essential for the IgG response against T-cell-independent type 2 antigens and commensal bacteria
Source: eLife. 2021 Oct 25;10:e72116. doi: 10.7554/eLife.72116 (PMC8610492; doi:10.7554/eLife.72116)
Supplement: Supplementary file 1. [file elife-72116-supp1.xlsx]

## Sheet: Table 1
Table 1.
Designation	Source or reference	Identifiers (Cat#)	Conc.
IL-1a	PeproTech	211-11A	10	ng/mL
IL-1b	PeproTech	211-11B	10	ng/mL
IL-2	PeproTech	212-12	10	ng/mL
IL-3	PeproTech	213-13	10	ng/mL
IL-4	PeproTech	214-14	10	ng/mL
IL-5	PeproTech	215-15	10	ng/mL
IL-6	PeproTech	216-16	10	ng/mL
IL-7	PeproTech	217-17	10	ng/mL
IL-9	PeproTech	219-19	10	ng/mL
IL-10	PeproTech	210-10	10	ng/mL
IL-12	Biolegend	210-12	10	ng/mL
IL-13	PeproTech	210-13	10	ng/mL
IL-15	PeproTech	210-15	40	ng/mL
IL-17A	PeproTech	210-17	10	ng/mL
IL-17F	PeproTech	210-17F	10	ng/mL
IL-21	PeproTech	210-21	10	ng/mL
IL-23	Biolegend	589002	1	ng/mL
IL-27	Biolegend	577402	100	ng/mL
IL-33	PeproTech	210-33	10	ng/mL
IFNa	Biolegend	752802	100	ng/mL
IFNg	PeproTech	315-05	20	ng/mL
IFNl2	PeproTech	250-33	10	ng/mL
TGFb	PeproTech	100-21	2	ng/mL
SCF	PeproTech	250-03	10	ng/mL
GMCSF	PeproTech	315-03	10	ng/mL
TNFa	PeproTech	315-01A	10	ng/mL
APRIL	PeproTech	315-13	250	ng/mL

## Sheet: Table 2
Table 2.
Primer name	Sequence 5' to 3'
Aicda Fw	cgtggtgaagaggagagatagtg
Aicda Rv	cagtctgagatgtagcgtaggaa
Bach2 Fw	ccatggacaggaactcaaaga
Bach2 Rv	aggtgattcctctccgac
Batf Fw	agcttcagccgctctcct
Batf Rv	gcagcgatgcgattcttc
E2a Fw	aagaggacaagaaggacctgaa
E2a Rv	ttattggccatacgcctctc
Foxo1 Fw	ctcaccctgtcgcagatctacgag
Foxo1 Rv	gttgtccatggacgcagctcttctc
Irf4 Fw	ccaaacgtcacaggacattg
Irf4 Rv	ctaccccatgacagcacctt
Pax5 Fw	gtcatcggtgagcaccgactc
Pax5 Rv	gaagccatggctgaatactc
Rel Fw	ttgcagagatggatactatgaagc
Rel Rv	caccgaatacccaaattttgaa
Rela Fw	cccagaccgcagtatccat
Rela Rv	gctccaggtctcgcttctt
Relb Fw	gccttgggttccagtgac
Relb Rv	tgtattcgtcgatgatttccaa
Rps18 Fw	gccgccatgtctctagtgatcc
Rps18 Rv	catgagcatatctccgcccc
external Ig3 Fw	tgggcaagtggatctgaaca
inner Ig3 Fw	aactactgctaccaccaccaccag
external Cµ Rv	aatggtgctgggcaggaagt
inner Cµ Rv	gaagacatttgggaaggactgact
Cg3 Rv	accaagggatagacagatgggg
Cµ Rv	tctgaaccttcaaggatgctcttg
Iµ Fw1	acctgggaatgtatggttgtggctt
Iµ Fw2	ctcggtggctttgaaggaac
