# Supplementary figures and images for: Protein kinase Cδ is essential for the IgG response against T-cell-independent type 2 antigens and commensal bacteria
Source: eLife journal article supplement (doi:10.7554/elife.72116), 2021-10-25

Figure 5-figure supplement 1. The expression of BATF and the phosphorylation of PKCδ

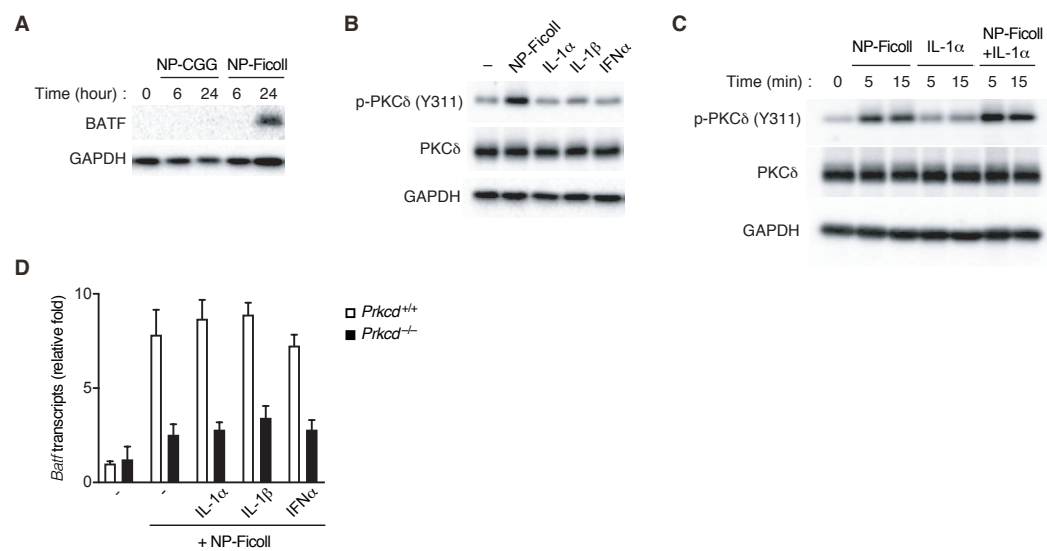

Supplement: supp [file elife-72116-supp-v1.zip]

Figure 3-figure supplement 1. B cell development and TD response of PKCδ-deficient mice

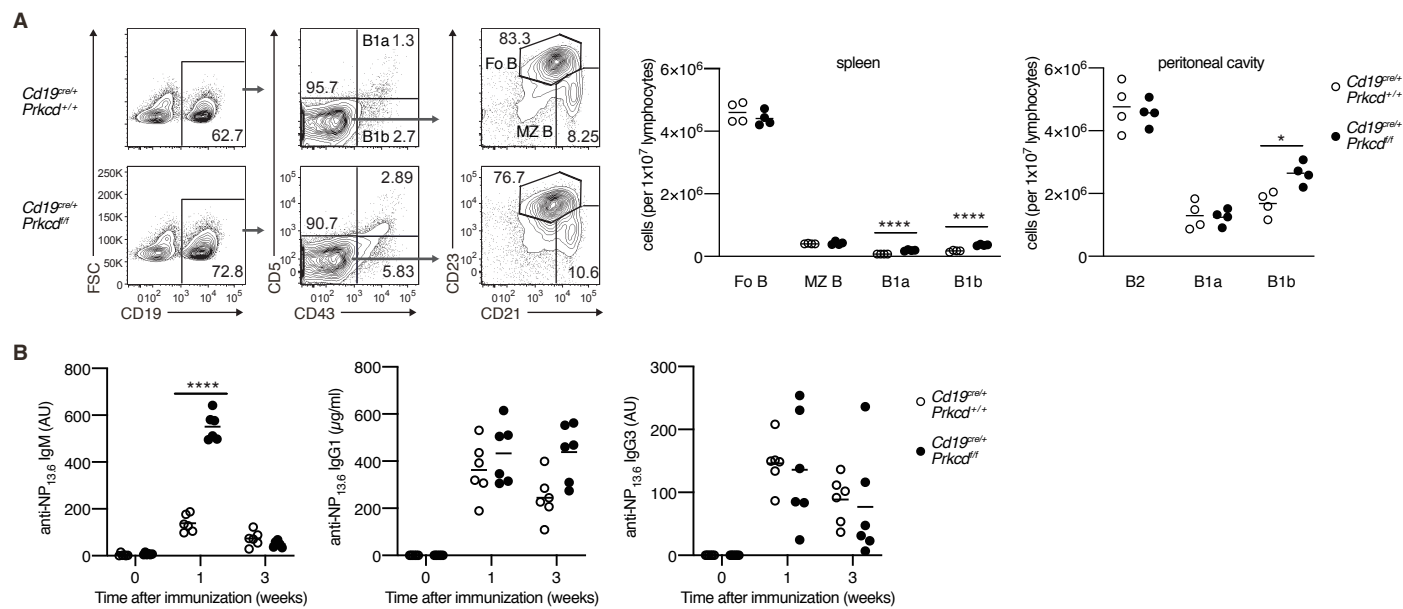

Supplement: supp [file elife-72116-supp-v1.zip]

Figure 4-figure supplement 1. Gating strategies and the expression of BATF

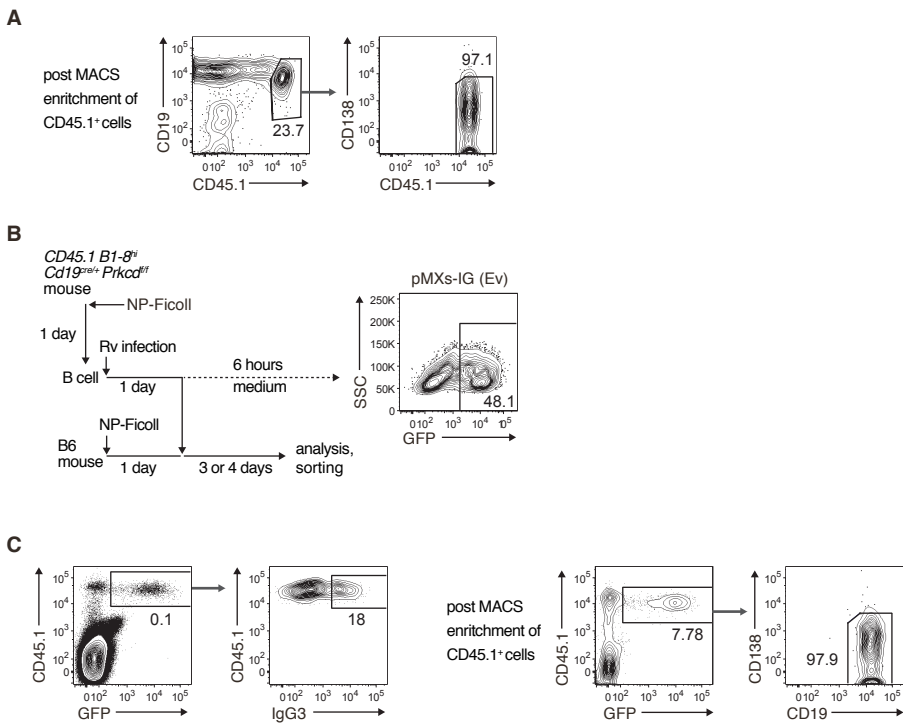

Supplement: supp [file elife-72116-supp-v1.zip]

Figure 2-figure supplement 1. In vitro response of PKC $\delta$ -deficient B cells

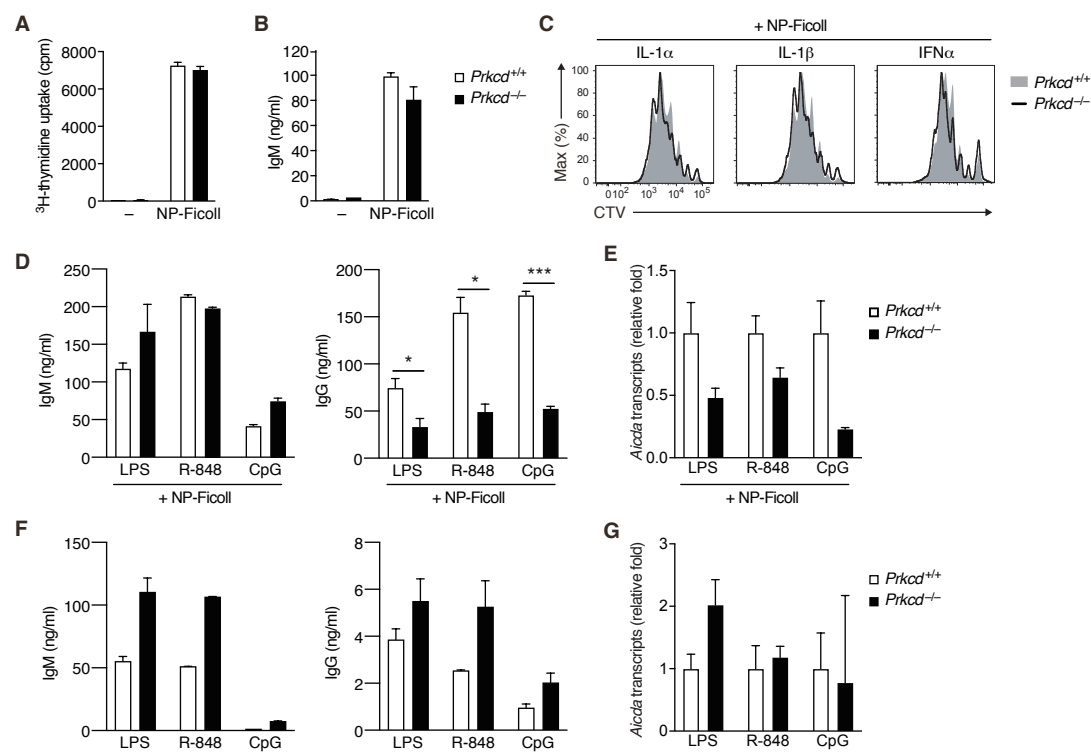

Supplement: supp [file elife-72116-supp-v1.zip]
